# Supplementary material for: Crystal plane-integrated strontium oxide/hexagonal boron nitride nanohybrids for rapid electrochemical sensing of anticancer drugs in human blood serum samples
Source: Royal Society of Chemistry journal article supplement (doi:10.1039/d3ay01493b), 2023-01-01
Supplement: d3ay01493b1.pdf [file d3ay01493b1.pdf]

## Supporting Information

### **Crystal Plane Integrated Strontium Oxide/Hexagonal Boron Nitride Nanohybrid For Rapid Electrochemical Sensing of Anticancer Drug In Human Blood Serum Sample**

Magesh Kumar Muthukumaran, Muthukumar Govindaraj, Bharathi Kannan Raja, and

Arockia Selvi J\*

Department of Chemistry, SRM Institute of Science and Technology, Kattankulathur-603203,

Tamil Nadu, India

**\*Corresponding author**

**Email:** [arockiaj@srmist.edu.in](mailto:arockiaj@srmist.edu.in) (J. Arockia Selvi)

## 2.1. Materials and reagents

All the chemicals and reagents [bulk boron nitride (h-BN) ( $\geq 99\%$  SRL), strontium chloride hexahydrate ( $\text{SrCl}_2 \cdot 6\text{H}_2\text{O}$ ) ( $\geq 99\%$  SRL), sodium hydroxide (NaOH) ( $\geq 98\%$  FISHER), acetonitrile, ethanol, methanol, 5-fluorouracil ( $\text{C}_4\text{H}_3\text{FN}_2\text{O}_2$ ) ( $\geq 99\%$  SRL), uric acid ( $\text{C}_5\text{H}_4\text{N}_4\text{O}_3$ ) ( $\geq 99\%$  SRL), lactose ( $\text{C}_{12}\text{H}_{22}\text{O}_{11}$ ) ( $\geq 98\%$  SRL), oxalic acid ( $\geq 99.5\%$  AR), ascorbic acid ( $\text{C}_6\text{H}_8\text{O}_6$ ) ( $\geq 99.7\%$  SRL), dopamine ( $\text{C}_8\text{H}_{11}\text{NO}_2$ ) ( $\geq 99\%$  SRL), L-cysteine ( $\text{C}_3\text{H}_7\text{NO}_2\text{S}$ ) ( $\geq 99\%$  SRL), glucose ( $\text{C}_6\text{H}_{12}\text{O}_6$ ) ( $\geq 99\%$  SRL), potassium ferricyanide ( $\text{C}_6\text{N}_6\text{FeK}_3$ ) ( $\geq 99\%$  SRL), potassium ferrocyanide ( $\text{C}_6\text{FeK}_4\text{N}_6$ ) ( $\geq 99\%$  SRL), potassium chloride (KCl) (99.8% Fisher), monosodium hydrogen phosphate ( $\text{NaH}_2\text{PO}_4$ ) ( $\geq 99\%$  SRL), and disodium hydrogen phosphate ( $\text{Na}_2\text{HPO}_4$ ) ( $\geq 99\%$  SRL)] are purchased in Sigma Aldrich and Alfa Aesar. To create a stock solution, ultrapure deionized water was used.  $\text{NaH}_2\text{PO}_4$  and  $\text{Na}_2\text{HPO}_4$  were combined to create 0.1 M phosphate buffer (PBS) (pH = 7.0) to detect 5-Fu. The human blood serum sample was collected from SRM Medical College Hospital and Research Center, Kattankulathur, Tamil Nadu, for real sample analysis. All the experiments were done using Milli-Q-water ( $18.2 \text{ M}\Omega \text{ cm @ } 25 \pm 2 \text{ }^\circ\text{C}$ ).

## 2.2. Materials characterization

High-resolution scanning electron microscopy (HR-SEM, ThermoScientific Apreo S) and transmission electron microscopy (TEM, JEM-2100 Plus, JEOL) were utilized to predict the morphological, surface properties, and chemical content, and the selected area electron diffraction (SAED) pattern of produced SrO, h-BN, and SrO/h-BN hybrid. Energy dispersive spectroscopy (EDS-JEM-2100 Plus, JEOL, and ThermoScientific Apreo S) was utilized for elemental and chemical composition. The crystalline nature of the synthesized compound was examined by using X-ray diffraction spectroscopy (XRD system-X'pert powder, with Cu-K $\alpha$  radiation ( $\lambda = 0.154 \text{ nm}$ ) Malvern Panalytical, United Kingdom) at 45 kV (tension) and 40 mA (current) with  $0.02^\circ$  per step scan and  $1^\circ$  per min speed. The Raman Spectroscopy technique analyzed the Vibrational modes of the synthesized materials. The Oxidation state of the prepared SrO/h-BN composite was analyzed by XPS analysis (). The cyclic voltammetry (CV), electrochemical impedance spectroscopy (EIS), differential pulse voltammetry (DPV), and amperometry ( $i-t$  curve) studies were carried out using a CHI electrochemical workstation (CHI 760E, USA). All the measurements were performed at room temperature using a three-electrode setup. The counter, reference, and working electrodes were platinum wire (Pt), Ag/AgCl (3 M KCl), and glassy carbon electrode (GCE), respectively.

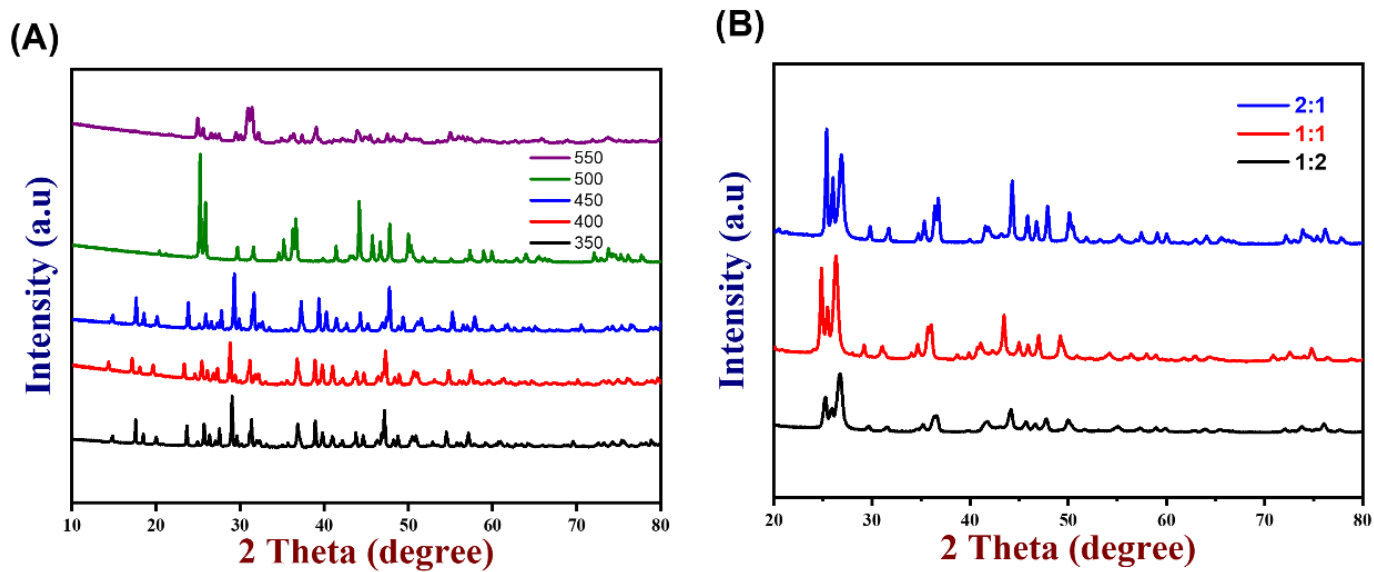

**Figure S1.** (A) XRD spectra of different calcination of strontium oxide and (B) different ratios (1:1, 1:2, 2:1) of strontium oxide: h-boron nitride.

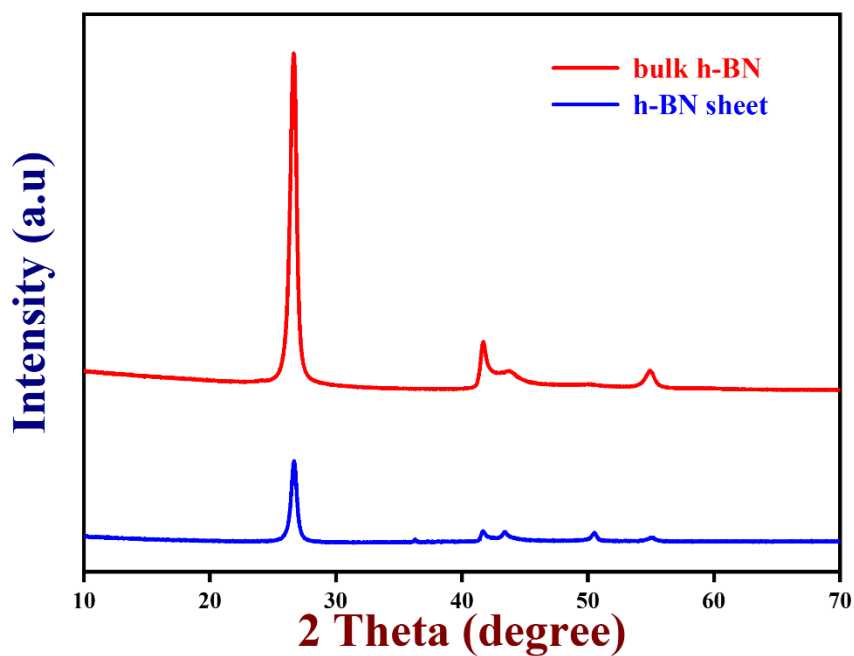

**Figure S2.** XRD spectra of Bulk h-BN and h-BN sheet

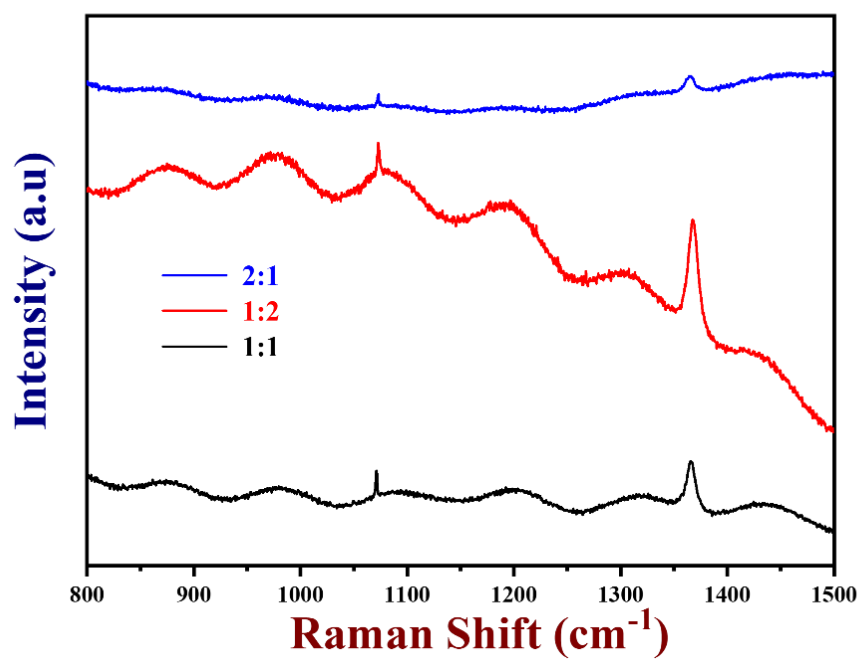

**Figure S3.** Raman spectra of different ratios of SrO:h-BN (1:1), (1:2) and (2:1)

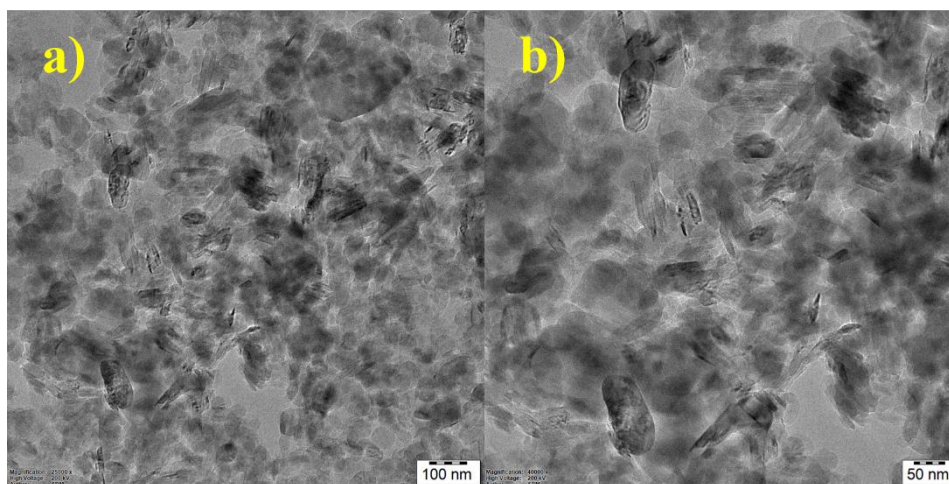

**Figure S4.** TEM images of a) & b) SrO/h-BN

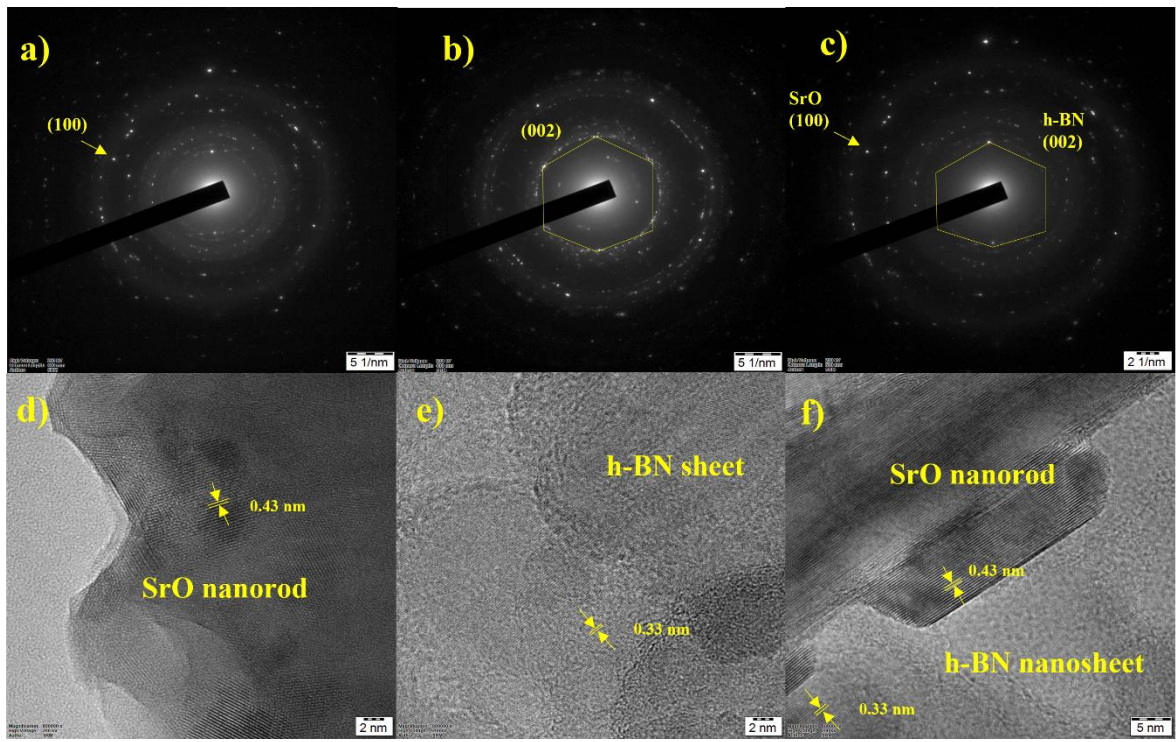

**Figure S5.** SAED pattern and lattice fringes of SrO (a, d), h-BN (b, e) and SrO/h-BN (c, f).

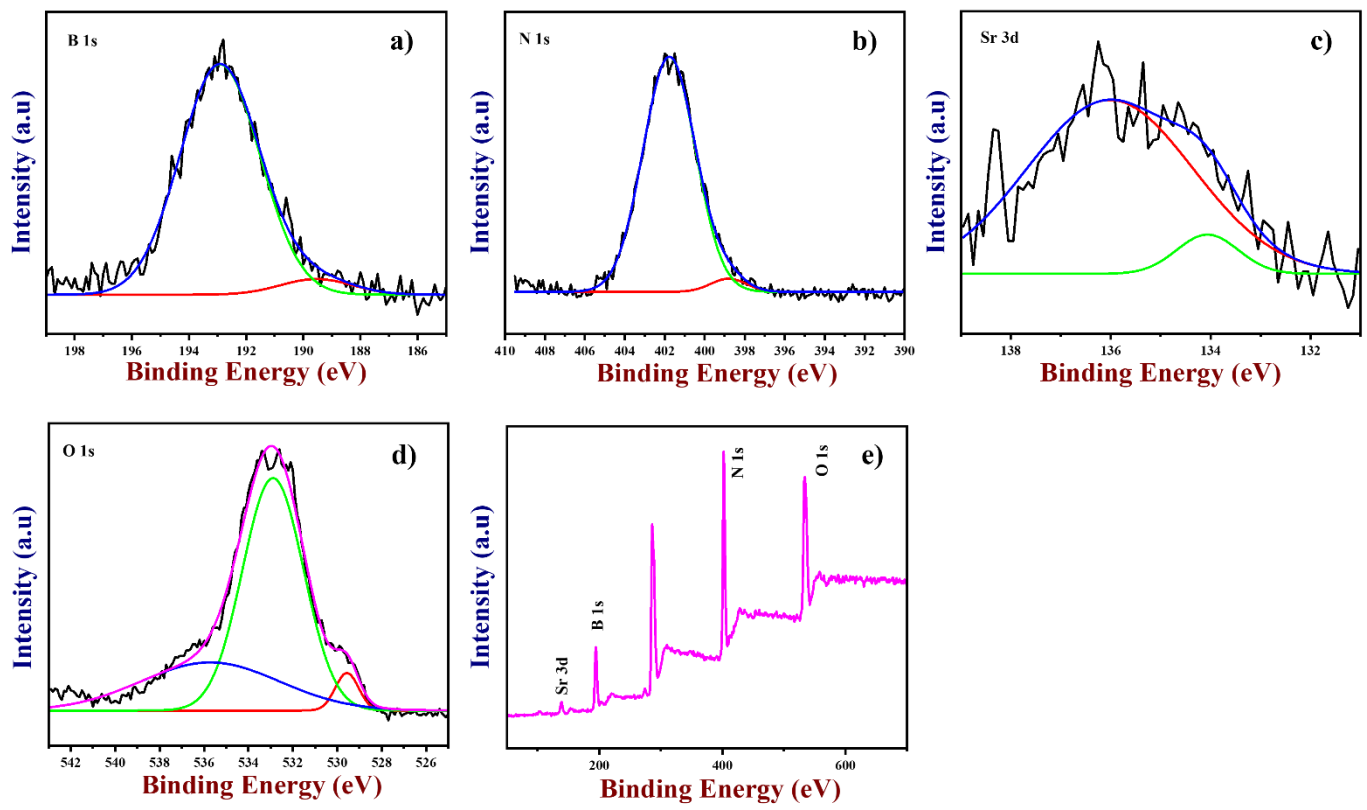

**Figure S6.** XPS spectrum of **a)** B 1s, **b)** N 1s, **c)** Sr 3d, **d)** O 1s and **e)** Survey spectrum of SrO/h-BN composite

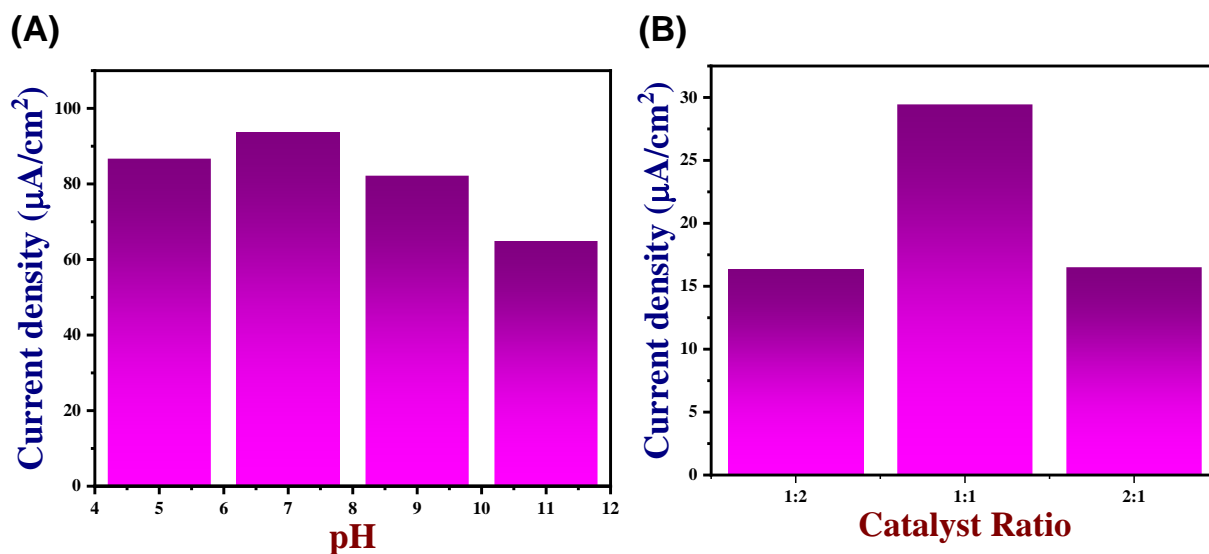

**Figure S7.** (A) Histogram of pH vs. current density and (B) the Catalyst ratio vs. current density.

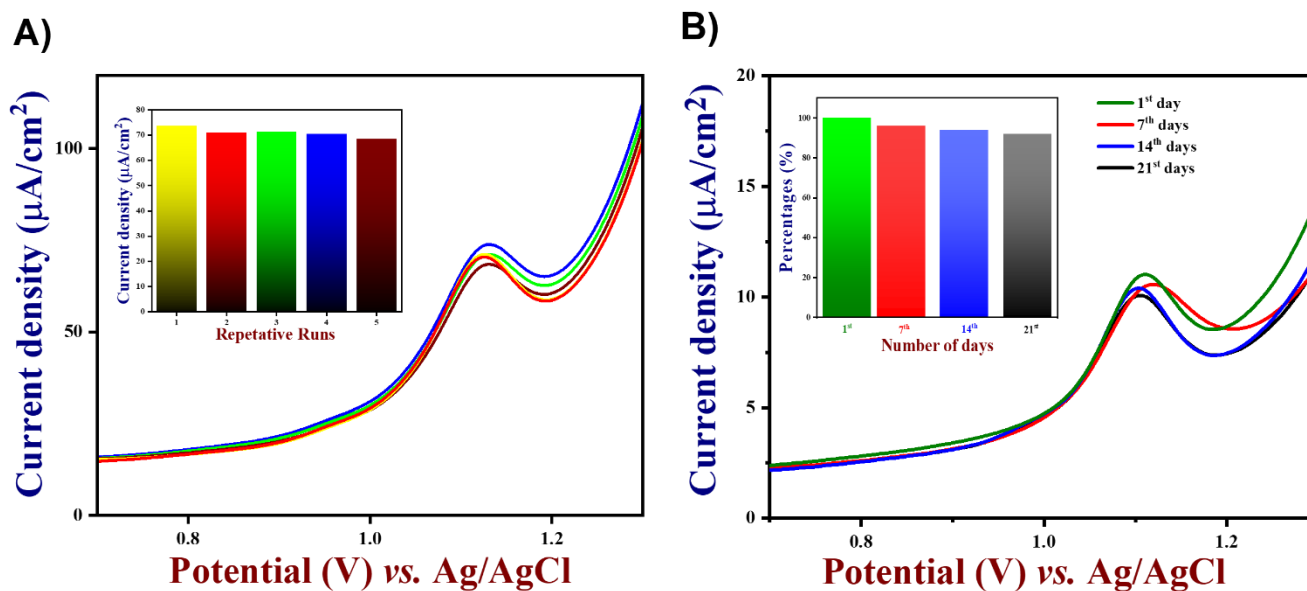

**Figure S8.** (A) Repeatability study (inset: histogram of 5 repetitive runs of electrodes and (B) Stability study of SrO/h-BN/GCE with 5-Fu by DPV.

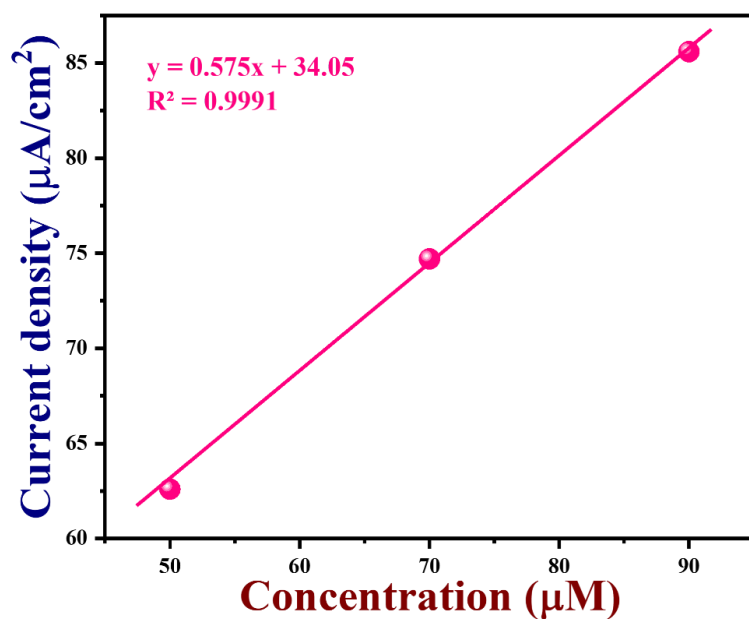

**Figure S9.** The kinetic plot of real sample analysis with current density vs. concentration

| S.NO | Modified Electrodes | $E_{pa}$ (V) | $E_{pc}$ (V) | $R_{ct}$ (ohm) | $J_{pa}$ (mA/cm <sup>2</sup> ) | $J_{pc}$ (mA/cm <sup>2</sup> ) | $E_p$ (mV) |
|------|---------------------|--------------|--------------|----------------|--------------------------------|--------------------------------|------------|
| 1    | bare GCE            | 320          | 090          | 3336           | 0.607                          | -0.633                         | 230        |
| 2    | SrO/GCE             | 280          | 087          | 1756           | 0.893                          | -0.926                         | 193        |
| 3    | h-BN/GCE            | 260          | 094          | 1650           | 0.883                          | -0.931                         | 166        |
| 4    | SrO/h-BN/GCE        | 245          | 132          | 506            | 1.010                          | -1.103                         | 113        |

**Table S1.** CV's profiles of all modified charge transfer electrodes,  $E_p$ , potentials and current densities of bare GCE, SrO/GCE, h-BN/GCE and SrO/h-BN/GCE.
